# Supplementary material for: TET1 facilitates specification of early human lineages including germ cells
Source: PubMed Central journal article supplement — iScience. 2023 Jun 21;26(7):107191. doi: 10.1016/j.isci.2023.107191 (PMC10345126; doi:10.1016/j.isci.2023.107191), 2023-06-21
Supplement: mmc1.pdf [file mmc1.pdf]

**iScience, Volume 26**

**Supplemental information**

**TET1 facilitates specification of early  
human lineages including germ cells**

**Fei-Man Hsu, Qiu Ya Wu, Emily B. Fabyanic, Alex Wei, Hao Wu, and Amander T. Clark**

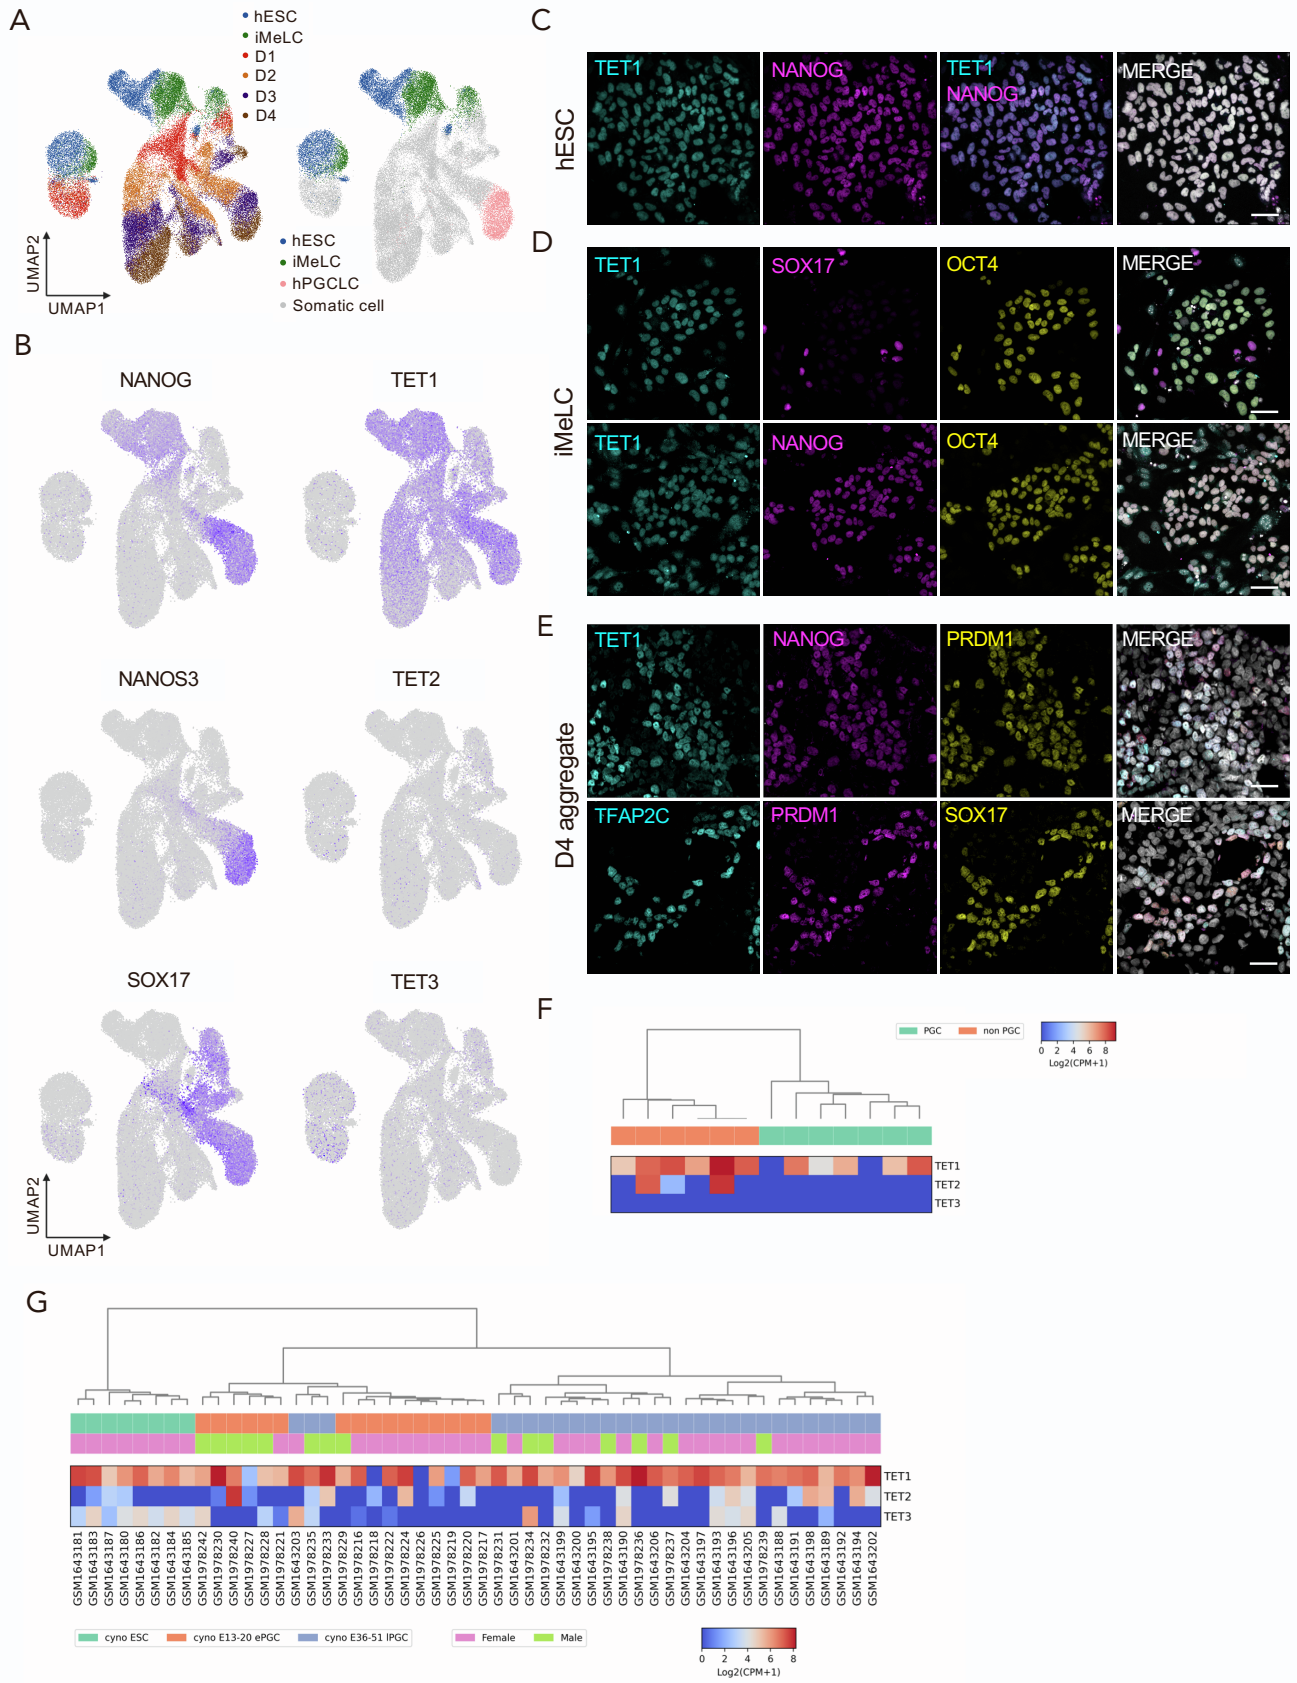

**Figure S1. TET1 expression profiles during hPGCLC induction in UCLA2, related to Figure 1.**

- (A) UMAPs of scRNA-seq data from <sup>1</sup> showing UCLA2 hESCs, iMeLCs and day (D)1 to D4 of aggregate differentiation (n= 48,820 cells displayed)
- (B) UMAPs from (A) displaying dynamic expression of the pluripotency gene (NANOG), the hPGC/hPGCLC-specific gene (NANOS3), the hPGC/hPGCLC and endoderm gene (SOX17) as well as the TET family mRNAs (*TET1*, *TET2* and *TET3*).
- (C) Representative IF images of TET1 in undifferentiated NANOG+ hESCs. Scale bar, 40  $\mu$ m.
- (D) Representative IF images of TET1 in NANOG+ but not SOX17+ iMeLCs. Scale bar, 40  $\mu$ m.
- (E) Representative IF images of TET1 in NANOG+/PRDM1+ hPGCLCs at D4 of aggregate differentiation. PRDM1+ hPGCLCs are also positive for TFAP2C and SOX17. Scale bar, 40  $\mu$ m.
- (F) TET1 is expressed in CS9 hPGC.
- (G) TET1 is expressed in cyPGC.

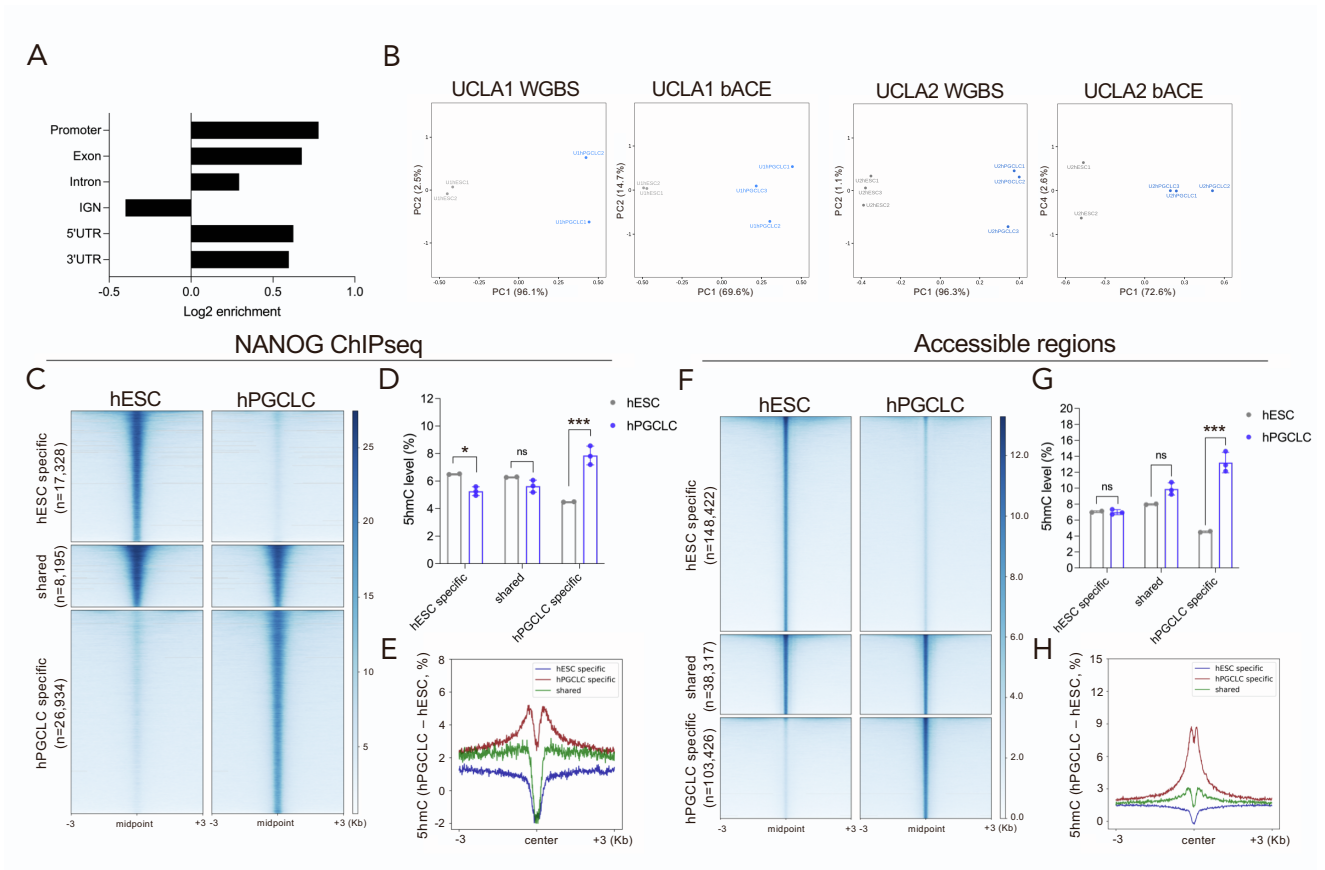

**Figure S2. 5hmC is enriched at hPGCLC-specific TF binding sites and accessible regions, related to Figure 2.**

- (A) DhMR is enriched in gene-centric regions.
- (B) PCA of WGBS and bACEseq in hESCs and hPGCLCs.
- (C) Heatmap of NANOG binding regions in hESCs and hPGCLCs (hPGCLC-specific binding refers to specific binding in hPGCLCs relative to hESCs).
- (D) Percentage 5hmC at genomic sites in (C) reveals that 5hmC is especially enriched at hPGCLC-specific NANOG binding regions in hPGCLCs. Data are represented as mean  $\pm$  SEM. The Student's *t*-test was performed to determine the significances with  $*p < 0.05$ ,  $**p < 0.01$  and  $***p < 0.001$ .
- (E) Metaplot of  $\Delta 5\text{hmC}$  from regions in (C).
- (F) Heatmap of accessible chromatin in hESCs and hPGCLCs (hPGCLC-specific refers to increased accessibility in hPGCLCs when compared to hESCs).
- (G) Percentage 5hmC at genomic sites in (F) reveals that 5hmC is enriched at hPGCLC-specific accessible regions in hPGCLCs. Data are represented as mean  $\pm$  SEM. The Student's *t*-test was performed to determine the significances with  $*p < 0.05$ ,  $**p < 0.01$  and  $***p < 0.001$ .
- (H) Metaplot of  $\Delta 5\text{hmC}$  from regions in (F).

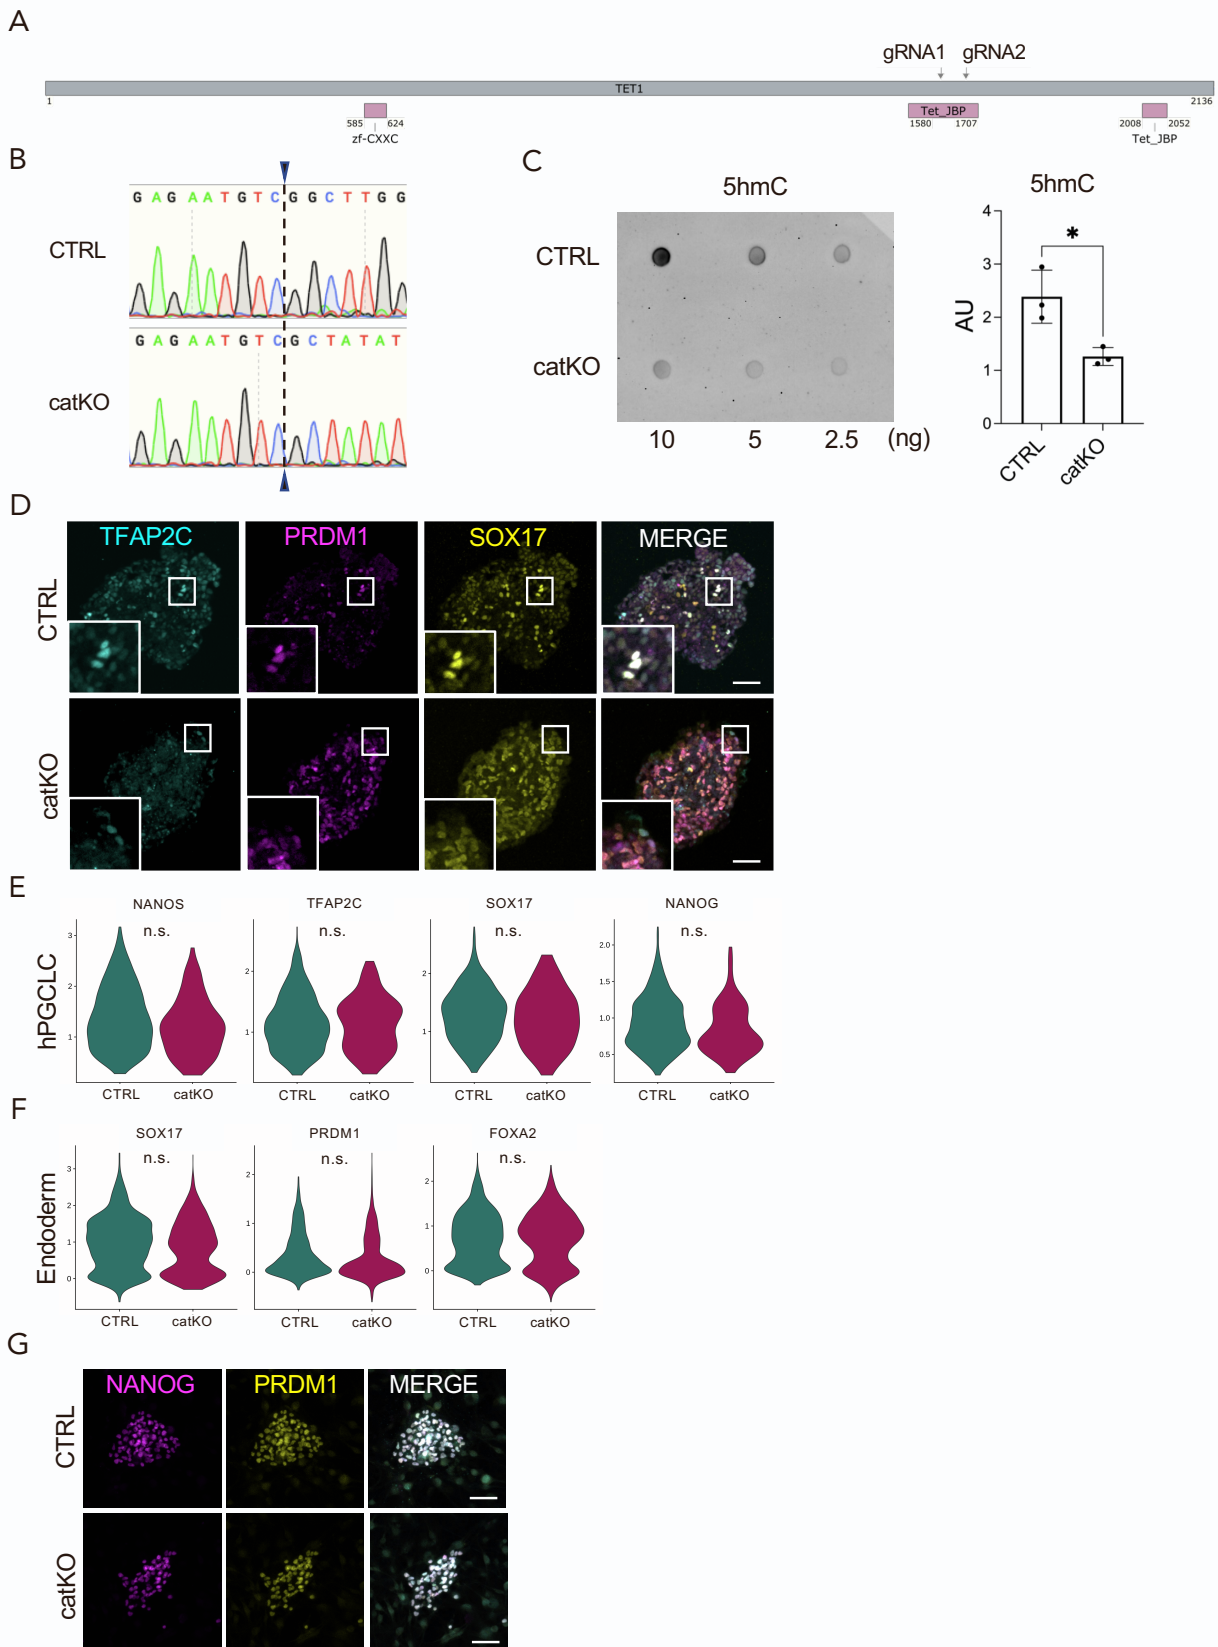

**Figure S3. Details of CRISPR/Cas9 knockout and hPGCLC and Endoderm-like cell identity with differentiation, related to Figure 3.**

- (A) A pair of guide RNAs were designed to target the TET1 catalytic domain.
- (B) Representative Sanger sequencing results from CTRL and catKO.
- (C) 5hmC dot blot in CTRL and catKO hESC genomic DNA. Data are represented as mean +/- SEM. The Student's *t*-test was performed to determine the significances with \* $p < 0.05$ , \*\* $p < 0.01$  and \*\*\* $p < 0.001$ .
- (D) Representative IF images showing endoderm bias begins at D2 in catKO aggregate. Scale bar, 80 $\mu$ m.
- (E) TET1 catKO mutant hPGCLCs show comparable gene expression. The Student's *t*-test was performed to determine the significances with \* $p < 0.05$ .
- (F) TET1 catKO mutant endoderm-like cells show comparable gene expression. The Student's *t*-test was performed to determine the significances with \* $p < 0.05$ .
- (G) ITGA6/EPCAM hPGCLCs were isolated at D4 from CTRL and catKO aggregates and cultured in extended culture for 21 days (D4C21). Cultured hPGCLCs from CTRL and catKO express NANOG and PRDM1. Scale bar, 50 $\mu$ m.

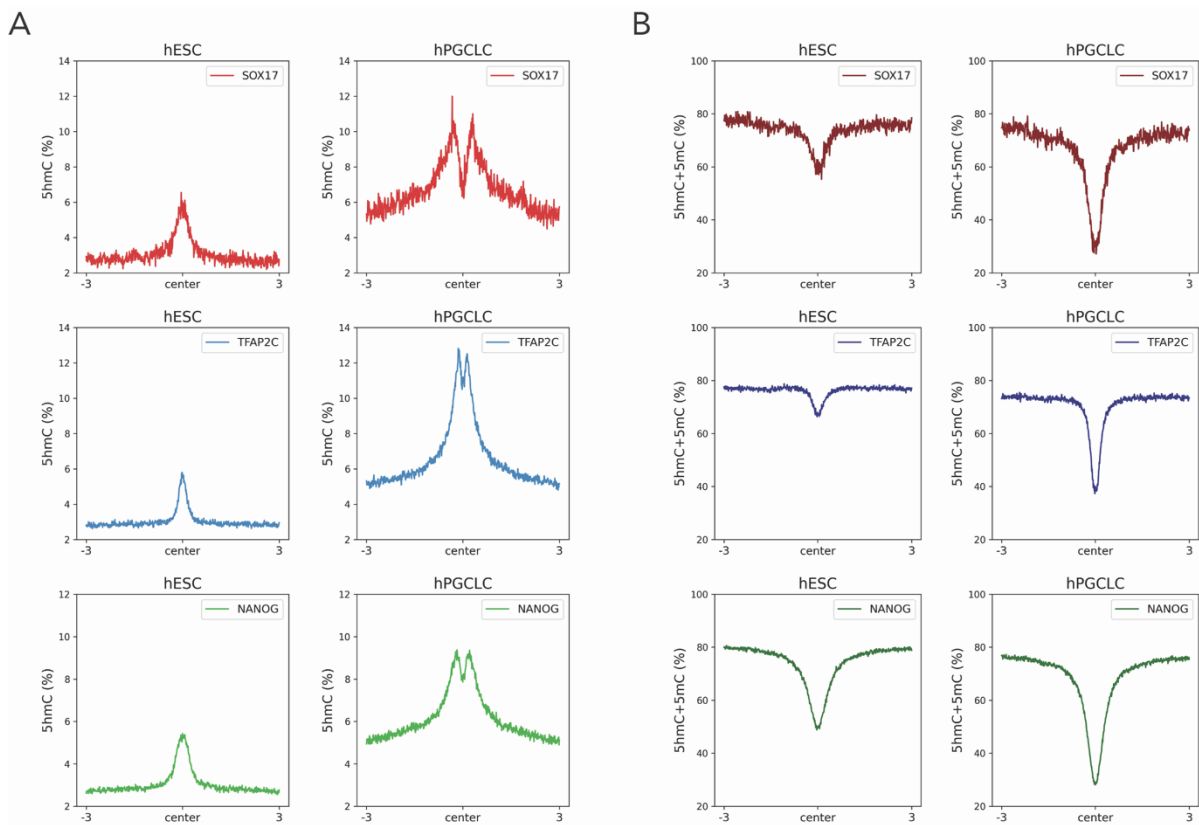

**Figure S4. TET1 is less active in hESC at hPGCLC-specific TFBS, related to Figure 4.**

- (A) hPGCLC-specific TFBSs are slightly enriched in 5hmC in hESC, and gain even more 5hmC after hPGCLC induction.
- (B) hPGCLC-specific TFBSs starts losing 5mC in hESC and are even depleted of 5mC after hPGCLC induction.

A

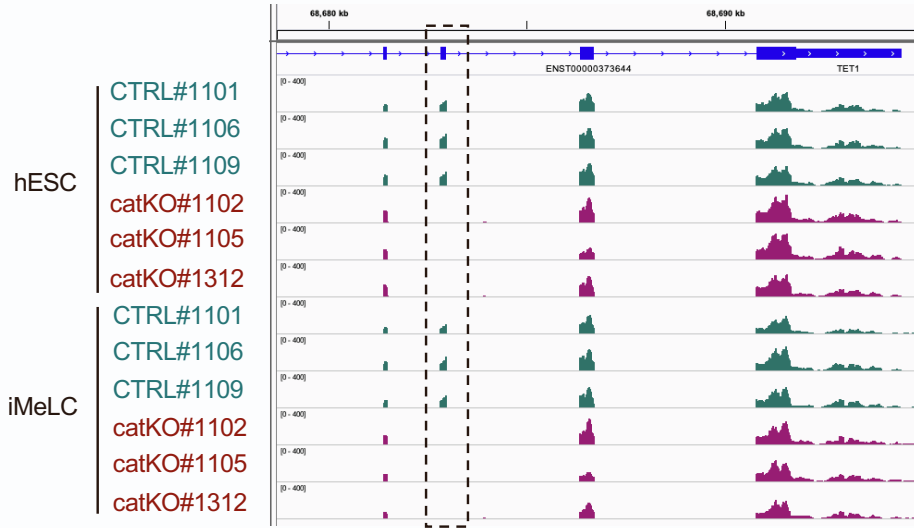

B

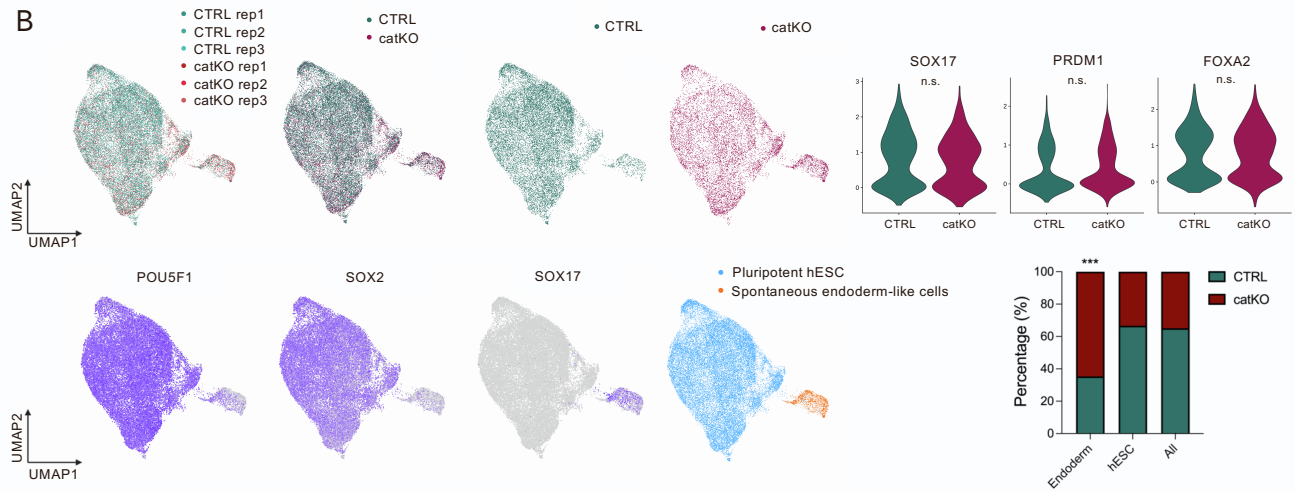

C

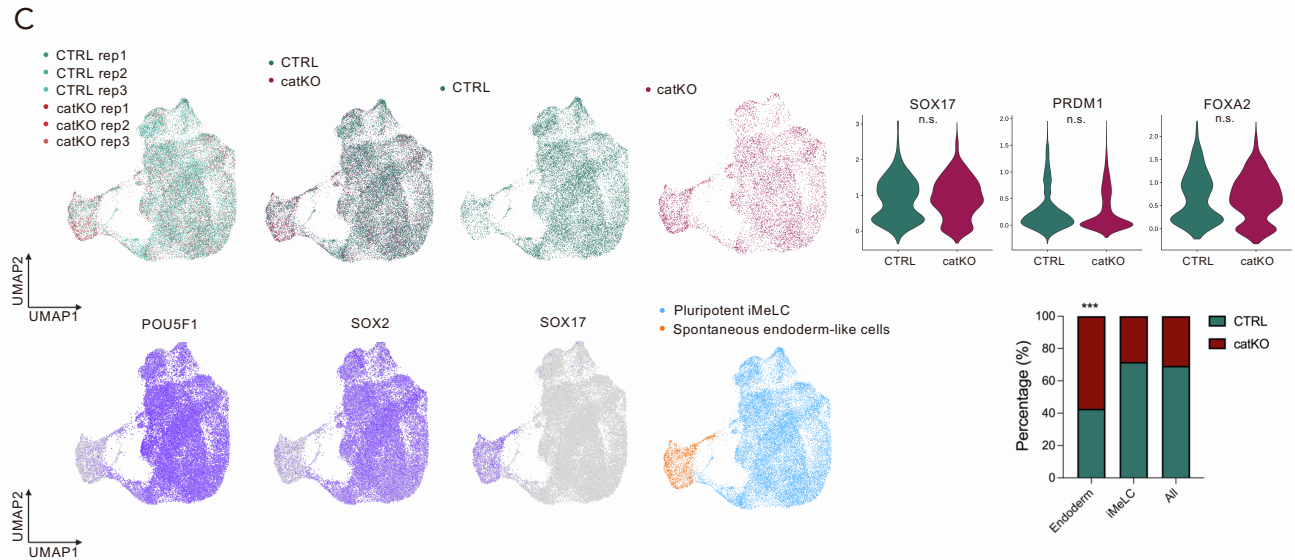



**Figure S5. TET1 catalytic activity restrains spontaneous endoderm differentiation in hESCs and iMeLCs, related to Figure 5.**

- (A) Genome browser track of bulk RNAseq showing deletion in TET1 catalytic domain.
- (B) UMAP of scRNAseq data from CTRL and catKO hESCs generated using 10X Genomics. (n=3 independent replicates of CTRL and TET1 catKO), n= 29,433 number of cells displayed. Top shows overlap of CTRL and TET1 catKO hESCs in the UMAP. Bottom shows Pluripotency genes *POU5F1* and *SOX2*. The violin plots show the *SOX17*, *PRDM1* and *FOXA2* expression of the spontaneous endoderm-like cells cluster displayed on the UMAP, and the Student's *t*-test was performed to determine the significances with  $*p < 0.05$ . The stacked bar chart shows the composition of endoderm-like cells is significantly increase in catKO, and Fisher's exact test was used to determine the significance with  $*p < 0.05$ ,  $**p < 0.01$  and  $***p < 0.001$ .
- (C) UMAP of scRNAseq from CTRL and catKO iMeLC generated with 10X Genomics. (n=3 independent replicates of CTRL and TET1 catKO), n= 28,025 number of cells displayed. Top shows overlay and deconvolution of CTRL and TET1 catKO iMeLCs in the UMAP. Bottom shows Pluripotency genes *POU5F1* and *SOX2*. The violin plots show the endoderm gene *SOX17*, *PRDM1* and *FOXA2* expression in the spontaneous endoderm-like cells cluster displayed on the UMAP, and the Student's *t*-test was performed to determine the significances with  $*p < 0.05$ . The stacked bar chart shows the composition of endoderm-like cells is significantly increased in catKO, and Fisher's exact test was used to determine the significance with  $*p < 0.05$ ,  $**p < 0.01$  and  $***p < 0.001$ .

**Table S1. WGBS and bACEseq libraries construct in this study, related to Figure 2.**

| <b>Library type</b> | <b>Cell line</b> | <b>Sample</b>       | <b>#Total reads</b> | <b>Mappability (%)</b> |
|---------------------|------------------|---------------------|---------------------|------------------------|
| WGBS                | UCLA1            | hESC replicate2     | 664,005,942         | 97.2                   |
| WGBS                | UCLA1            | hESC replicate3     | 457,638,140         | 97.2                   |
| WGBS                | UCLA1            | D4hPGCLC replicate2 | 318,024,343         | 97.1                   |
| WGBS                | UCLA1            | D4hPGCLC replicate3 | 546,319,972         | 96.9                   |
| WGBS                | UCLA2            | hESC replicate1     | 810,926,832         | 97.2                   |
| WGBS                | UCLA2            | hESC replicate2     | 431,308,172         | 97.2                   |
| WGBS                | UCLA2            | hESC replicate3     | 612,300,195         | 97.2                   |
| WGBS                | UCLA2            | D4hPGCLC replicate1 | 795,694,334         | 96.6                   |
| WGBS                | UCLA2            | D4hPGCLC replicate2 | 588,486,763         | 97.1                   |
| WGBS                | UCLA2            | D4hPGCLC replicate3 | 502,871,088         | 97.0                   |
| bACEseq             | UCLA1            | hESC replicate1     | 1,328,431,585       | 96.3                   |
| bACEseq             | UCLA1            | hESC replicate3     | 839,571,111         | 96.7                   |
| bACEseq             | UCLA1            | D4hPGCLC replicate1 | 1,680,496,307       | 94.5                   |
| bACEseq             | UCLA1            | D4hPGCLC replicate2 | 717,046,904         | 96.1                   |
| bACEseq             | UCLA1            | D4hPGCLC replicate3 | 824,697,411         | 96.0                   |
| bACEseq             | UCLA2            | hESC replicate2     | 805,636,528         | 96.3                   |
| bACEseq             | UCLA2            | hESC replicate3     | 613,582,866         | 96.6                   |
| bACEseq             | UCLA2            | D4hPGCLC replicate1 | 686,857,892         | 96.1                   |
| bACEseq             | UCLA2            | D4hPGCLC replicate2 | 722,444,940         | 96.1                   |
| bACEseq             | UCLA2            | D4hPGCLC replicate3 | 630,833,981         | 96.8                   |

**Table S2. Details of 10X libraries created for this study, related to Figure 3.**

| <b>Sample</b>     | <b>#Total reads</b> | <b>Mappability (%)</b> | <b>#Valid cells</b> | <b>median UMIs</b> |
|-------------------|---------------------|------------------------|---------------------|--------------------|
| CTRL#1101 hESC    | 171,283,234         | 72.8                   | 7587                | 6010               |
| CTRL#1106 hESC    | 173,545,059         | 70.5                   | 6834                | 6387               |
| CTRL#1109 hESC    | 128,274,507         | 72.2                   | 4754                | 6536               |
| catKO#1102 hESC   | 165,061,174         | 58.2                   | 2948                | 11596              |
| catKO#1105 hESC   | 174,609,315         | 48.2                   | 3437                | 8396               |
| catKO#1312 hESC   | 132,432,829         | 46.4                   | 3873                | 5713               |
| CTRL#1101 iMeLC   | 172,479,910         | 76.3                   | 2126                | 27789              |
| CTRL#1106 iMeLC   | 171,565,256         | 65.5                   | 8574                | 6393               |
| CTRL#1109 iMeLC   | 177,802,407         | 73.8                   | 8680                | 6599               |
| catKO#1102 iMeLC  | 170,486,170         | 65.8                   | 3547                | 14311              |
| catKO#1105 iMeLC  | 174,911,961         | 42.9                   | 2167                | 15279              |
| catKO#1312 iMeLC  | 140,329,600         | 63.0                   | 2895                | 13682              |
| CTRL#1101 D4aggr  | 192,139,067         | 85.4                   | 5313                | 3948               |
| CTRL#1106 D4aggr  | 225,893,933         | 85.3                   | 5347                | 4114               |
| CTRL#1109 D4aggr  | 166,441,276         | 83.2                   | 9675                | 2323               |
| catKO#1102 D4aggr | 169,078,959         | 82.4                   | 6341                | 3079               |
| catKO#1105 D4aggr | 188,952,867         | 83.1                   | 6579                | 3377               |
| catKO#1312 D4aggr | 208,218,684         | 83.6                   | 4964                | 4405               |

**Table S3. Details of bulk RNAseq libraries created for this study, related to Figure 5.**

| <b>Library type</b> | <b>Cell line</b> | <b>Sample</b>    | <b>#Total read pairs</b> | <b>Mappability (%)</b> |
|---------------------|------------------|------------------|--------------------------|------------------------|
| RNAseq              | UCLA1            | CTRL#1101 hESC   | 65,488,888               | 60.6                   |
| RNAseq              | UCLA1            | CTRL#1106 hESC   | 78,326,513               | 56.4                   |
| RNAseq              | UCLA1            | CTRL#1109 hESC   | 75,213,438               | 63.2                   |
| RNAseq              | UCLA1            | catKO#1102 hESC  | 46,951,012               | 68.3                   |
| RNAseq              | UCLA1            | catKO#1105 hESC  | 72,163,591               | 65.9                   |
| RNAseq              | UCLA1            | catKO#1312 hESC  | 69,858,296               | 65.3                   |
| RNAseq              | UCLA1            | CTRL#1101 iMeLC  | 129,947,695              | 55.8                   |
| RNAseq              | UCLA1            | CTRL#1106 iMeLC  | 115,548,571              | 61.7                   |
| RNAseq              | UCLA1            | CTRL#1109 iMeLC  | 134,637,954              | 61.5                   |
| RNAseq              | UCLA1            | catKO#1102 iMeLC | 65,759,606               | 57.3                   |
| RNAseq              | UCLA1            | catKO#1105 iMeLC | 143,230,121              | 49.8                   |
| RNAseq              | UCLA1            | catKO#1312 iMeLC | 111,129,317              | 52.1                   |

**Table S4. Genomic datasets re-analyzed in this study, related to Figure 1, 2 and 4.**

| <b>Library type</b> | <b>Protein</b> | <b>Dataset</b> | <b>Reference</b>                           |
|---------------------|----------------|----------------|--------------------------------------------|
| ChIPseq             | H3K27ac        | GSE69646       | Ji <i>et al.</i> , 2016 <sup>2</sup>       |
| ChIPseq             | H3K27ac        | GSE140021      | Chen <i>et al.</i> , 2019 <sup>1</sup>     |
| ChIPseq             | H3K4me3        | GSE159654      | Tang <i>et al.</i> , 2022 <sup>3</sup>     |
| ChIPseq             | TET1-V5        | GSE169207      | Dixon <i>et al.</i> , 2021 <sup>4</sup>    |
| ChIPseq             | TFAP2C         | GSE140021      | Chen <i>et al.</i> , 2019 <sup>1</sup>     |
| ChIPseq             | SOX17          | GSE182218      | Xiang <i>et al.</i> , 2022 <sup>5</sup>    |
| ChIPseq             | NANOG          | GSE182218      | Xiang <i>et al.</i> , 2022 <sup>5</sup>    |
| ChIPseq             | PRDM1          | GSE159654      | Tang <i>et al.</i> , 2022 <sup>3</sup>     |
| ATACseq             | NA             | GSE120648      | Chen <i>et al.</i> , 2018 <sup>6</sup>     |
| Single cell RNAseq  | NA             | GSE140021      | Chen <i>et al.</i> , 2019 <sup>1</sup>     |
| Single cell RNAseq  | NA             | GSE76267       | Sasaki <i>et al.</i> , 2016 <sup>7</sup>   |
| Single cell RNAseq  | NA             | GSE74767       | Nakamura <i>et al.</i> , 2016 <sup>8</sup> |
| Single cell RNAseq  | NA             | E-MTAB-6967    | Tyser <i>et al.</i> , 2021 <sup>9</sup>    |

## REFERENCES

1. Chen, D., Sun, N., Hou, L., Kim, R., Faith, J., Aslanyan, M., Tao, Y., Zheng, Y., Fu, J., Liu, W., et al. (2019). Human Primordial Germ Cells Are Specified from Lineage-Primed Progenitors. *Cell reports* 29, 4568–4582.e5. 10.1016/j.celrep.2019.11.083.
2. Ji, X., Dadon, D.B., Powell, B.E., Fan, Z.P., Borges-Rivera, D., Shachar, S., Weintraub, A.S., Hnisz, D., Pegoraro, G., Lee, T.I., et al. (2016). 3D Chromosome Regulatory Landscape of Human Pluripotent Cells. *Cell Stem Cell* 18, 262–275. 10.1016/j.stem.2015.11.007.
3. Tang, W.W.C., Castillo-Venzor, A., Gruhn, W.H., Kobayashi, T., Penfold, C.A., Morgan, M.D., Sun, D., Irie, N., and Surani, M.A. (2022). Sequential enhancer state remodelling defines human germline competence and specification. *Nat Cell Biol*, 1–13. 10.1038/s41556-022-00878-z.
4. Dixon, G., Pan, H., Yang, D., Rosen, B.P., Jashari, T., Verma, N., Pulecio, J., Caspi, I., Lee, K., Stransky, S., et al. (2021). QSER1 protects DNA methylation valleys from de novo methylation. *Science* 372, eabd0875. 10.1126/science.abd0875.
5. Xiang, X., Tao, Y., DiRusso, J., Hsu, F.-M., Zhang, J., Xue, Z., Pontis, J., Trono, D., Liu, W., and Clark, A.T. (2022). Human reproduction is regulated by retrotransposons derived from ancient Hominidae-specific viral infections. *Nat Commun* 13, 463. 10.1038/s41467-022-28105-1.
6. Chen, D., Liu, W., Zimmerman, J., Pastor, W.A., Kim, R., Hosohama, L., Ho, J., Aslanyan, M., Gell, J.J., Jacobsen, S.E., et al. (2018). The TFAP2C-Regulated OCT4 Naive Enhancer Is Involved in Human Germline Formation. *Cell reports* 25, 3591–3602.e5. 10.1016/j.celrep.2018.12.011.
7. Sasaki, K., Nakamura, T., Okamoto, I., Yabuta, Y., Iwatani, C., Tsuchiya, H., Seita, Y., Nakamura, S., Shiraki, N., Takakuwa, T., et al. (2016). The Germ Cell Fate of Cynomolgus Monkeys Is Specified in the Nascent Amnion. *Developmental cell* 39, 169–185. 10.1016/j.devcel.2016.09.007.
8. Nakamura, T., Okamoto, I., Sasaki, K., Yabuta, Y., Iwatani, C., Tsuchiya, H., Seita, Y., Nakamura, S., Yamamoto, T., and Saitou, M. (2016). A developmental coordinate of pluripotency among mice, monkeys and humans. *Nature* 537, 57–62. 10.1038/nature19096.
9. Tyser, R.C.V., Mahammadov, E., Nakanoh, S., Vallier, L., Scialdone, A., and Srinivas, S. (2021). Single-cell transcriptomic characterization of a gastrulating human embryo. *Nature* 600, 285–289. 10.1038/s41586-021-04158-y.
